# Supplementary material
Source: Springer Nature journal article supplement (https://www.springermedizin.de/resource/supplementary/12933_2010_334_MOESM1_ESM.pdf/9538176)
Supplement: MOESM1 [file 9538176]

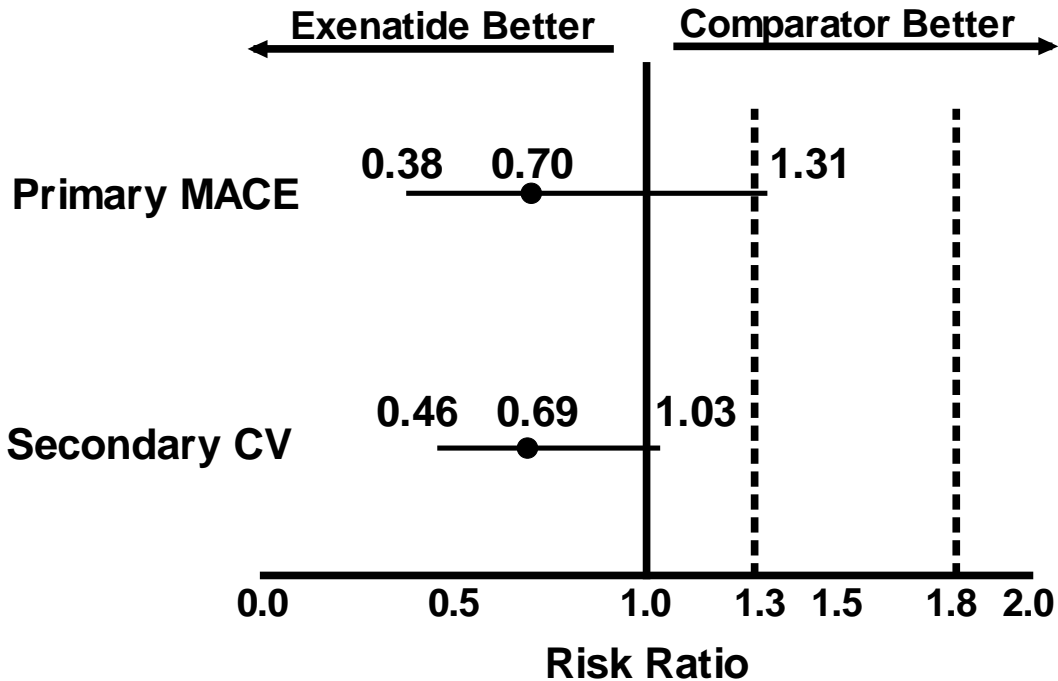

• RR exenatide BID vs. all placebo or comparator studies

Per FDA guidance, if upper limit of 95% CI <1.3 a post-marketing safety study may not be required;  $\geq 1.3$  to <1.8 a post-marketing study may be required to demonstrate <1.3,  $\geq 1.8$  large safety study may be required prior to approval.
